# Supplementary material
Source: MDPI journal article supplement (https://www.mdpi.com/2073-4433/14/7/1066)
Supplement: s1 [file s1]

## Supplementary Materials:

# In Vitro Bioaccessibility and Health Risk of Heavy Metals from PM<sub>2.5</sub>/PM<sub>10</sub> in Arid Areas—Hotan City, China

**Table S1.** Detection limit of heavy metals (µg/mL).

| Element | Pb     | Mn     | Ni     | Cd     | As     |
|---------|--------|--------|--------|--------|--------|
| IDLs    | 0.0085 | 0.0017 | 0.0028 | 0.0020 | 0.0015 |
| MDLs    | 0.0256 | 0.0051 | 0.0083 | 0.0061 | 0.0044 |
| LOQ     | 0.0283 | 0.0057 | 0.0093 | 0.0067 | 0.0050 |

**Table S2.** Composition and pH of extraction fluids [62].

| Extraction fluid           | Composition (per liter DI water)                                                                                                                                                                                                                                                                 | pH  |
|----------------------------|--------------------------------------------------------------------------------------------------------------------------------------------------------------------------------------------------------------------------------------------------------------------------------------------------|-----|
| Gamble's solution          | Magnesium chloride (0.095 g), sodium chloride (6.019 g), potassium chloride (0.298 g), disodium hydrogen phosphate (0.126 g), sodium sulphate (0.063 g), calcium chloride dihydrate (0.368 g), sodium acetate (0.574 g), sodium hydrogen carbonate (2.604 g), sodium citrate dihydrate (0.097 g) | 7.4 |
| Simulated gastric juice    | Sodium citrate (0.5 g), malic acid (0.5 g), lactic acid (420 µL), acetic acid (500 µL), pepsin (1.25 g)                                                                                                                                                                                          | 2   |
| Simulated intestinal juice | Trypsin (0.05 g) and bile salts (0.175 g) were introduced into the reaction solution of gastric juice                                                                                                                                                                                            | 7   |

**Table S3.** Reference dose (RFD) and slope factors (SF) of different exposure pathway [44].

|                  |                                                        | Pb                    | Mn                    | Ni                    | Cd                    | As                    |
|------------------|--------------------------------------------------------|-----------------------|-----------------------|-----------------------|-----------------------|-----------------------|
| RfC <sub>i</sub> | mg m <sup>-3</sup>                                     |                       | $5.00 \times 10^{-5}$ | $1.40 \times 10^{-5}$ | $1.00 \times 10^{-5}$ | $1.50 \times 10^{-5}$ |
| RfDo             | mg kg <sup>-1</sup> day <sup>-1</sup>                  | $3.50 \times 10^{-3}$ | $1.40 \times 10^{-1}$ | $1.10 \times 10^{-2}$ | $1.00 \times 10^{-4}$ | $3.00 \times 10^{-4}$ |
| IUR              | (µg m <sup>-3</sup> ) <sup>-1</sup>                    | $1.20 \times 10^{-5}$ | --                    | $2.40 \times 10^{-4}$ | $1.80 \times 10^{-3}$ | $4.30 \times 10^{-3}$ |
| SFo              | (mg kg <sup>-1</sup> day <sup>-1</sup> ) <sup>-1</sup> | $8.50 \times 10^{-5}$ | --                    | $1.70 \times 10^0$    |                       | $1.50 \times 10^0$    |

**Table S4.** Parameter values used in ADD calculation models and Monte Carlo simulation of heavy metals in PM<sub>2.5</sub> and PM<sub>10</sub>.

| Exposure parameters            | Abbreviation | Unit   | Distribution | Probable value |        | Min      |        | Max      |        | SD       |        | References |
|--------------------------------|--------------|--------|--------------|----------------|--------|----------|--------|----------|--------|----------|--------|------------|
|                                |              |        |              | Children       | Adults | Children | Adults | Children | Adults | Children | Adults |            |
| Ingestion rate                 | IngR         | mg/day | Triangular   | 200            | 100    | 143.6    | 71.8   | 244.4    | 122.2  |          |        | [63]       |
| Exposure frequency             | EF           | day/a  | Triangular   | 180            | 180    | 60       | 60     | 345      | 345    |          |        | [44]       |
| Exposure duration              | ED           | a      | Triangular   | 6              | 24     | 1        | 5      | 15       | 45     |          |        | [44]       |
| Body weight                    | BW           | kg     | Normal       | 14.9           | 58.6   |          | 42.1   |          | 71.6   | 5.8      | 5.8    | [64]       |
| Average time (carcinogenic)    | ATc          | d      | /            | 25550          | 25550  | 25550    | 25550  | 25550    | 25550  |          |        | [65]       |
| Average time (noncarcinogenic) | ATnc         | d      | Triangular   | 2190           | 8760   | 365      | 1825   | 5475     | 16425  |          |        | [65]       |

**Table S5.** Exposure concentration ( $EC_{inh}$ ) ( $\mu\text{g m}^{-3}$ ) and chemical daily intake ( $CDI_{ing}$ ) ( $\text{mg}\cdot\text{kg}^{-1}\cdot\text{d}^{-1}$ ) for each heavy metal by different pathways in winter.

| Toxic elements    |    | $EC_{inh}$            |                       |                       |                       | $CDI_{ing}$           |                       |                       |                       |
|-------------------|----|-----------------------|-----------------------|-----------------------|-----------------------|-----------------------|-----------------------|-----------------------|-----------------------|
|                   |    | non-Carcinogenic      |                       | Carcinogenic          |                       | non-Carcinogenic      |                       | Carcinogenic          |                       |
|                   |    | Children              | Adults                | Children              | Adults                | Children              | Adults                | Children              | Adults                |
| PM <sub>2.5</sub> | Pb | $8.24 \times 10^{-3}$ | $8.24 \times 10^{-3}$ | $7.07 \times 10^{-4}$ | $2.83 \times 10^{-3}$ | $1.92 \times 10^{-3}$ | $2.44 \times 10^{-4}$ | $1.64 \times 10^{-4}$ | $8.35 \times 10^{-5}$ |
|                   | Mn | $6.87 \times 10^{-3}$ | $6.87 \times 10^{-3}$ | $5.89 \times 10^{-4}$ | $2.36 \times 10^{-3}$ | $1.42 \times 10^{-3}$ | $1.81 \times 10^{-4}$ | $1.22 \times 10^{-4}$ | $6.19 \times 10^{-5}$ |
|                   | Ni | $7.60 \times 10^{-4}$ | $7.60 \times 10^{-4}$ | $6.51 \times 10^{-5}$ | $2.60 \times 10^{-4}$ | $3.86 \times 10^{-5}$ | $4.90 \times 10^{-6}$ | $3.30 \times 10^{-6}$ | $1.68 \times 10^{-6}$ |
|                   | Cd | $6.85 \times 10^{-4}$ | $6.85 \times 10^{-4}$ | $5.87 \times 10^{-5}$ | $2.35 \times 10^{-4}$ | $5.50 \times 10^{-5}$ | $6.99 \times 10^{-6}$ | $4.71 \times 10^{-6}$ | $2.40 \times 10^{-6}$ |
|                   | As | $8.66 \times 10^{-4}$ | $8.66 \times 10^{-4}$ | $7.42 \times 10^{-5}$ | $2.97 \times 10^{-4}$ | $5.20 \times 10^{-5}$ | $6.61 \times 10^{-6}$ | $4.46 \times 10^{-6}$ | $2.27 \times 10^{-6}$ |
| PM <sub>10</sub>  | Pb | $1.53 \times 10^{-2}$ | $1.53 \times 10^{-2}$ | $1.31 \times 10^{-3}$ | $5.25 \times 10^{-3}$ | $1.40 \times 10^{-3}$ | $1.78 \times 10^{-4}$ | $1.20 \times 10^{-4}$ | $6.12 \times 10^{-5}$ |
|                   | Mn | $1.35 \times 10^{-2}$ | $1.35 \times 10^{-2}$ | $1.16 \times 10^{-3}$ | $4.63 \times 10^{-3}$ | $2.09 \times 10^{-3}$ | $2.66 \times 10^{-4}$ | $1.79 \times 10^{-4}$ | $9.13 \times 10^{-5}$ |
|                   | Ni | $4.79 \times 10^{-4}$ | $4.79 \times 10^{-4}$ | $4.11 \times 10^{-5}$ | $1.64 \times 10^{-4}$ | $9.09 \times 10^{-5}$ | $1.16 \times 10^{-5}$ | $7.79 \times 10^{-6}$ | $3.96 \times 10^{-6}$ |
|                   | Cd | $1.08 \times 10^{-3}$ | $1.08 \times 10^{-3}$ | $9.28 \times 10^{-5}$ | $3.71 \times 10^{-4}$ | $6.48 \times 10^{-5}$ | $8.24 \times 10^{-6}$ | $5.56 \times 10^{-6}$ | $2.83 \times 10^{-6}$ |
|                   | As | $1.39 \times 10^{-3}$ | $1.39 \times 10^{-3}$ | $1.19 \times 10^{-4}$ | $4.76 \times 10^{-4}$ | $3.94 \times 10^{-5}$ | $5.02 \times 10^{-6}$ | $3.38 \times 10^{-6}$ | $1.72 \times 10^{-6}$ |

**Table S6.** Exposure concentration ( $EC_{inh}$ ) ( $\mu\text{g m}^{-3}$ ) and chemical daily intake ( $CDI_{ing}$ ) ( $\text{mg}\cdot\text{kg}^{-1}\cdot\text{d}^{-1}$ ) for each heavy metal by different pathways in summer.

| Toxic elements    |    | $EC_{inh}$            |                       |                       |                       | $CDI_{ing}$           |                       |                       |                       |
|-------------------|----|-----------------------|-----------------------|-----------------------|-----------------------|-----------------------|-----------------------|-----------------------|-----------------------|
|                   |    | non-Carcinogenic      |                       | Carcinogenic          |                       | non-Carcinogenic      |                       | Carcinogenic          |                       |
|                   |    | Children              | Adults                | Children              | Adults                | Children              | Adults                | Children              | Adults                |
| PM <sub>2.5</sub> | Pb | $2.82 \times 10^{-3}$ | $2.82 \times 10^{-3}$ | $2.42 \times 10^{-4}$ | $9.67 \times 10^{-4}$ | $2.26 \times 10^{-4}$ | $2.87 \times 10^{-5}$ | $1.94 \times 10^{-5}$ | $9.84 \times 10^{-6}$ |
|                   | Mn | $1.73 \times 10^{-2}$ | $1.73 \times 10^{-2}$ | $1.48 \times 10^{-3}$ | $5.92 \times 10^{-3}$ | $7.43 \times 10^{-4}$ | $9.44 \times 10^{-5}$ | $6.37 \times 10^{-5}$ | $3.24 \times 10^{-5}$ |
|                   | Ni | $1.38 \times 10^{-3}$ | $1.38 \times 10^{-3}$ | $1.18 \times 10^{-4}$ | $4.73 \times 10^{-4}$ | $5.94 \times 10^{-5}$ | $7.55 \times 10^{-6}$ | $5.09 \times 10^{-6}$ | $2.59 \times 10^{-6}$ |
|                   | Pb | $8.04 \times 10^{-3}$ | $8.04 \times 10^{-3}$ | $6.89 \times 10^{-4}$ | $2.76 \times 10^{-3}$ | $3.06 \times 10^{-4}$ | $3.89 \times 10^{-5}$ | $2.62 \times 10^{-5}$ | $1.33 \times 10^{-5}$ |
| PM <sub>10</sub>  | Mn | $2.69 \times 10^{-2}$ | $2.69 \times 10^{-2}$ | $2.30 \times 10^{-3}$ | $9.21 \times 10^{-3}$ | $1.16 \times 10^{-3}$ | $1.48 \times 10^{-4}$ | $9.96 \times 10^{-5}$ | $5.07 \times 10^{-5}$ |
|                   | Ni | $7.26 \times 10^{-3}$ | $7.26 \times 10^{-3}$ | $6.22 \times 10^{-4}$ | $2.49 \times 10^{-3}$ | $1.17 \times 10^{-4}$ | $1.49 \times 10^{-5}$ | $1.00 \times 10^{-5}$ | $5.09 \times 10^{-6}$ |

**Table S7.** The Pearson correlation coefficient matrix of heavy metals in PM<sub>2.5</sub> and PM<sub>10</sub> of summer and winter.

| Sampling period             |    | Pb      | Mn      | Ni      | Cd      | As |
|-----------------------------|----|---------|---------|---------|---------|----|
| PM <sub>2.5</sub> in summer | Pb | 1       |         |         |         |    |
|                             | Mn | 0.423   | 1       |         |         |    |
|                             | Ni | 0.271   | 0.858** | 1       |         |    |
|                             | Cd | 0.425   | 0.466   | 0.06    | 1       |    |
|                             | As | 0.33    | 0.311   | −0.044  | 0.903** | 1  |
| PM <sub>2.5</sub> in winter | Pb | 1       |         |         |         |    |
|                             | Mn | −0.023  | 1       |         |         |    |
|                             | Ni | 0.212   | 0.44    | 1       |         |    |
|                             | Cd | 0.365   | 0.516*  | 0.426   | 1       |    |
|                             | As | −0.101  | −0.058  | −0.306  | 0.144   | 1  |
| PM <sub>10</sub> in summer  | Pb | 1       |         |         |         |    |
|                             | Mn | −0.041  | 1       |         |         |    |
|                             | Ni | 0.662** | 0.324   | 1       |         |    |
|                             | Cd | 0.677** | 0.104   | 0.691** | 1       |    |
|                             | As | 0.680** | 0.066   | 0.675** | 0.999** | 1  |
| PM <sub>10</sub> in winter  | Pb | 1       |         |         |         |    |
|                             | Mn | 0.218   | 1       |         |         |    |
|                             | Ni | 0.078   | 0.639** | 1       |         |    |
|                             | Cd | −0.077  | −0.511* | −0.051  | 1       |    |
|                             | As | −0.038  | −0.344  | −0.014  | 0.815** | 1  |

\* Significant level at p-value <0.05 (two-tailed).

\*\* Significant level at p-value <0.01 (two-tailed).

**Table S8.** Bioaccessibility of heavy metals in summer and winter.

|        |                   |                  | <b>As</b> | <b>Cd</b> | <b>Mn</b> | <b>Ni</b> | <b>Pb</b> |
|--------|-------------------|------------------|-----------|-----------|-----------|-----------|-----------|
| Summer | PM <sub>2.5</sub> | lung fluid       | N/A       | N/A       | 49.9%     | 53.3%     | 51.3%     |
|        |                   | gastric juice    | N/A       | N/A       | 64.1%     | 42.3%     | 69.2%     |
|        |                   | intestinal fluid | N/A       | N/A       | 40.1%     | 30.1%     | 38.3%     |
|        | PM <sub>10</sub>  | lung fluid       | N/A       | N/A       | 44.4%     | 33.9%     | 47.8%     |
|        |                   | gastric juice    | N/A       | N/A       | 52.0%     | 11.3%     | 36.8%     |
|        |                   | intestinal fluid | N/A       | N/A       | 41.4%     | 14.0%     | 38.5%     |
| Winter | PM <sub>2.5</sub> | lung fluid       | 36.8%     | 74.7%     | 43.4%     | 25.0%     | 32.3%     |
|        |                   | gastric juice    | 19.9%     | 55.1%     | 88.0%     | 11.7%     | 68.1%     |
|        |                   | intestinal fluid | N/A       | 37.5%     | 49.3%     | 11.5%     | 15.5%     |
|        | PM <sub>10</sub>  | lung fluid       | 44.5%     | 62.3%     | 37.3%     | 16.2%     | 40.4%     |
|        |                   | gastric juice    | 17.0%     | 49.8%     | 85.1%     | 42.3%     | 50.9%     |
|        |                   | intestinal fluid | N/A       | 29.1%     | 46.3%     | 17.6%     | 13.2%     |

Note: N/A indicates that the concentration is lower than the detection limit.

**Table S9.** Coefficient of variation for each metal in summer and winter.

|        |                   | <b>Pb</b> | <b>Mn</b> | <b>Ni</b> | <b>Cd</b> | <b>As</b> |
|--------|-------------------|-----------|-----------|-----------|-----------|-----------|
| Winter | PM <sub>10</sub>  | 19.46%    | 37.13%    | 13.00%    | 15.63%    | 7.75%     |
|        | PM <sub>2.5</sub> | 11.63%    | 39.84%    | 23.34%    | 12.90%    | 11.97%    |
| Summer | PM <sub>10</sub>  | 26.97%    | 56.27%    | 23.10%    | 1.60%     | 2.04%     |
|        | PM <sub>2.5</sub> | 46.23%    | 114.25%   | 58.48%    | 118.26%   | 122.15%   |
